# Supplementary material for: Fabrication of photothermal silver nanoparticles for accelerating MRSA-infected wound healing
Source: Royal Society of Chemistry journal article supplement (doi:10.1039/d4nj05492j), 2025-01-01
Supplement: d4nj05492j1.pdf [file d4nj05492j1.pdf]

## Supporting Information for

# **The Fabrication of Photothermal Silver Nanoparticles for Accelerating MRSA-Infected Wound Healing**

*Simin Wei,<sup>a</sup> Yuhui Wang,<sup>a</sup> Mengmeng Wang,<sup>a</sup> Siqi Su,<sup>a</sup> Mengke Hao,<sup>a</sup> Yinghui Wang<sup>b\*</sup>*

<sup>a</sup> State Key Laboratory of Research & Development of Characteristic Qin Medicine Resources (Cultivation), Co-Construction Collaborative Innovation Center for Chinese Medicine Resources Industrialization by Shaanxi & Education Ministry, Shaanxi University of Chinese Medicine, Xianyang 712083, China

<sup>b</sup> College of Science, Chang'an University, Xi'an 710064, China

\* E-mail: wangyinghui@chd.edu.cn

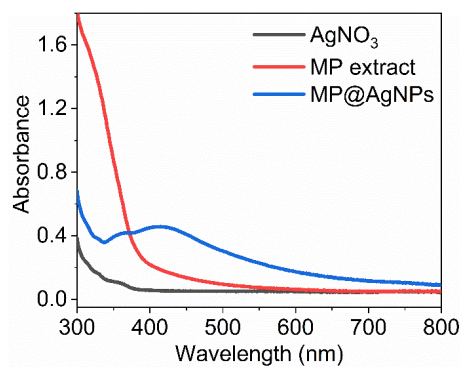

**Figure S1** UV-vis spectra of the MP and MP@AgNPs

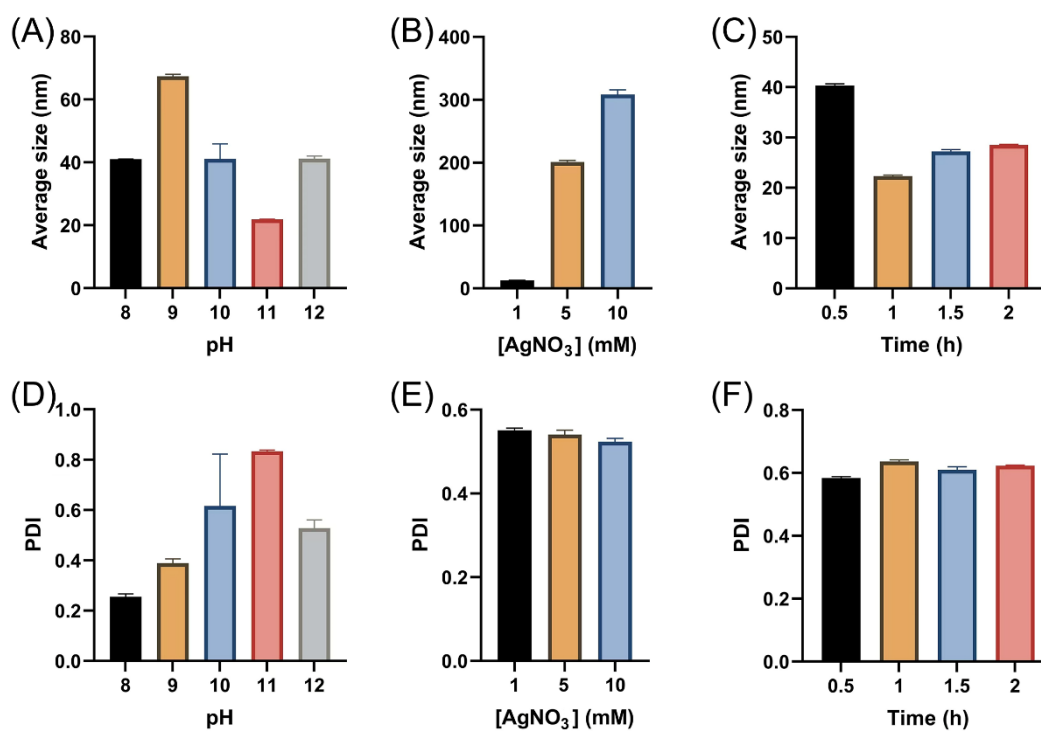

**Figure S2** Average size of MP@AgNPs biosynthesized at different (A) pH levels; (B) AgNO<sub>3</sub> concentration and (C) incubation times. PDI of MP@AgNPs biosynthesized at different (D) pH levels; (E) AgNO<sub>3</sub> concentration and (F) incubation times

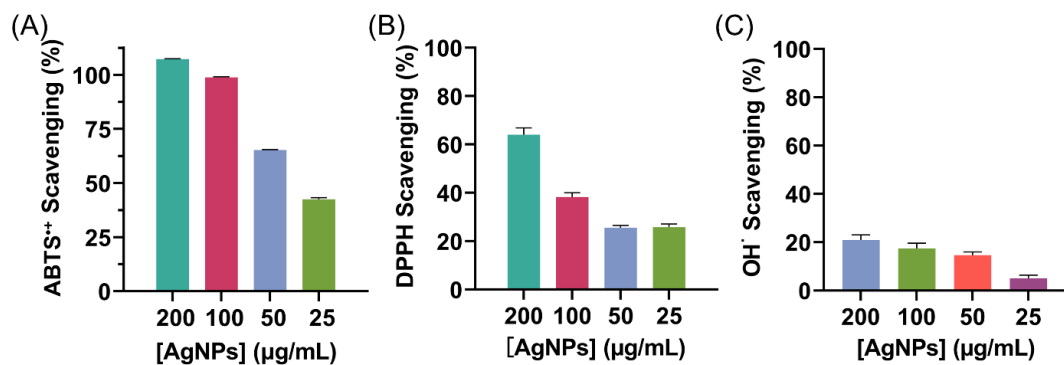

**Figure S3** Free radical scavenging rate of MP@AgNPs against (A) ABTS<sup>•+</sup>; (B) DPPH radical and (C) •OH

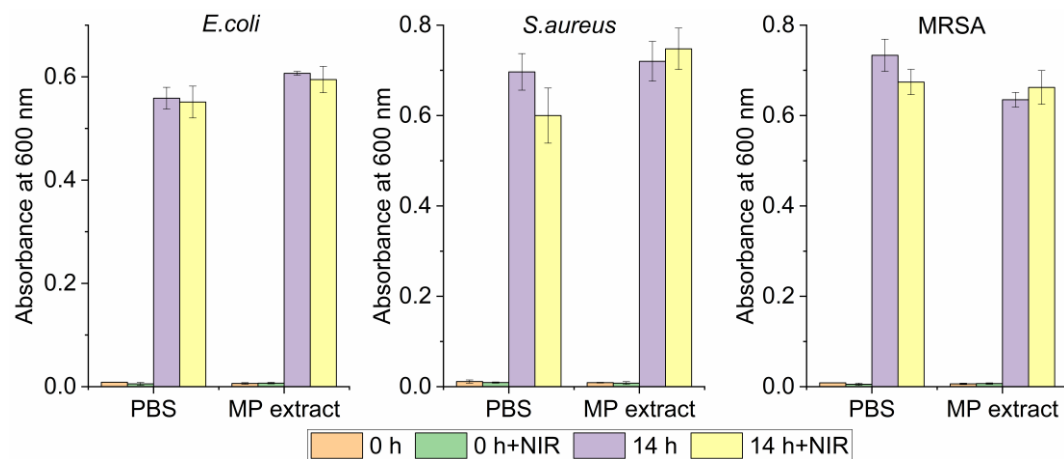

**Figure S4** The absorbance of bacteria at 600 nm after treating with PBS and MP extract

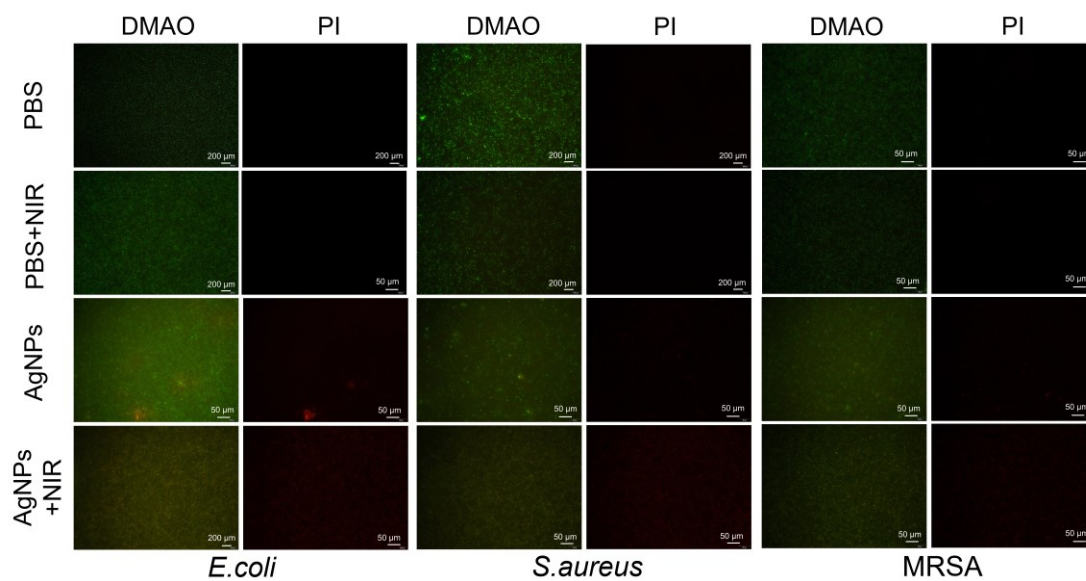

**Figure S5** Live/dead staining of bacteria by DMAO and PI

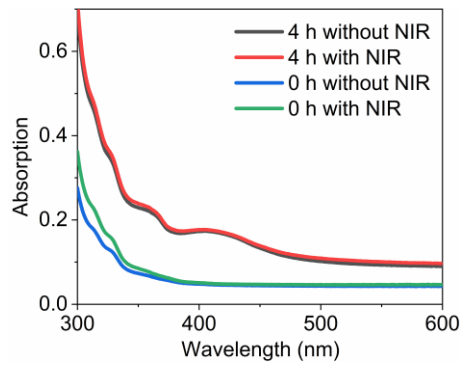

**Figure S6** UV-vis spectrum of eluate of integrated hydrogel in PBS

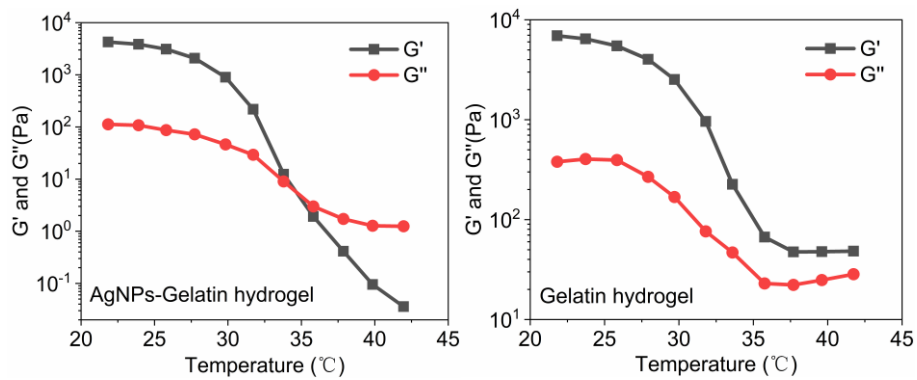

**Figure S7** Temperature-dependent rheological analysis

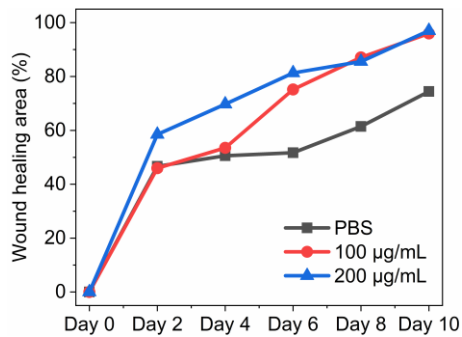

**Figure S8** The count of wound healing area
